# Supplementary material for: Deficiency of peroxisomal NUDT7 stimulates de novo lipogenesis in hepatocytes
Source: PubMed Central journal article supplement — iScience. 2022 Sep 13;25(10):105135. doi: 10.1016/j.isci.2022.105135 (PMC9523354; doi:10.1016/j.isci.2022.105135), 2022-09-13
Supplement: mmc1.pdf [file mmc1.pdf]

iScience, Volume 25

## Supplemental information

Deficiency of peroxisomal

NUDT7 stimulates *de novo*

lipogenesis in hepatocytes

Jinsoo Song, In-Jeoung Baek, Sujeong Park, Jinjoo Oh, Deokha Kim, Kyung Song, Mi Kyung Kim, Hye Won Lee, Byoung Kuk Jang, and Eun-Jung Jin

**Supplement Information**

**Deficiency of peroxisomal NUDT7 stimulates de novo lipogenesis in hepatocytes**

**Jinsoo Song<sup>1,2</sup>, In-Jeoung Baek<sup>3</sup>, Sujeong Park<sup>1</sup>, Jinjoo Oh<sup>1</sup>, Deokha Kim<sup>1</sup>, Kyung Song<sup>4</sup>,**

**Mi Kyung Kim<sup>5</sup>, Hye Won Lee<sup>6</sup>, Byoung Kuk Jang<sup>5</sup>, Eun-Jung Jin<sup>1, 2, 7\*</sup>**

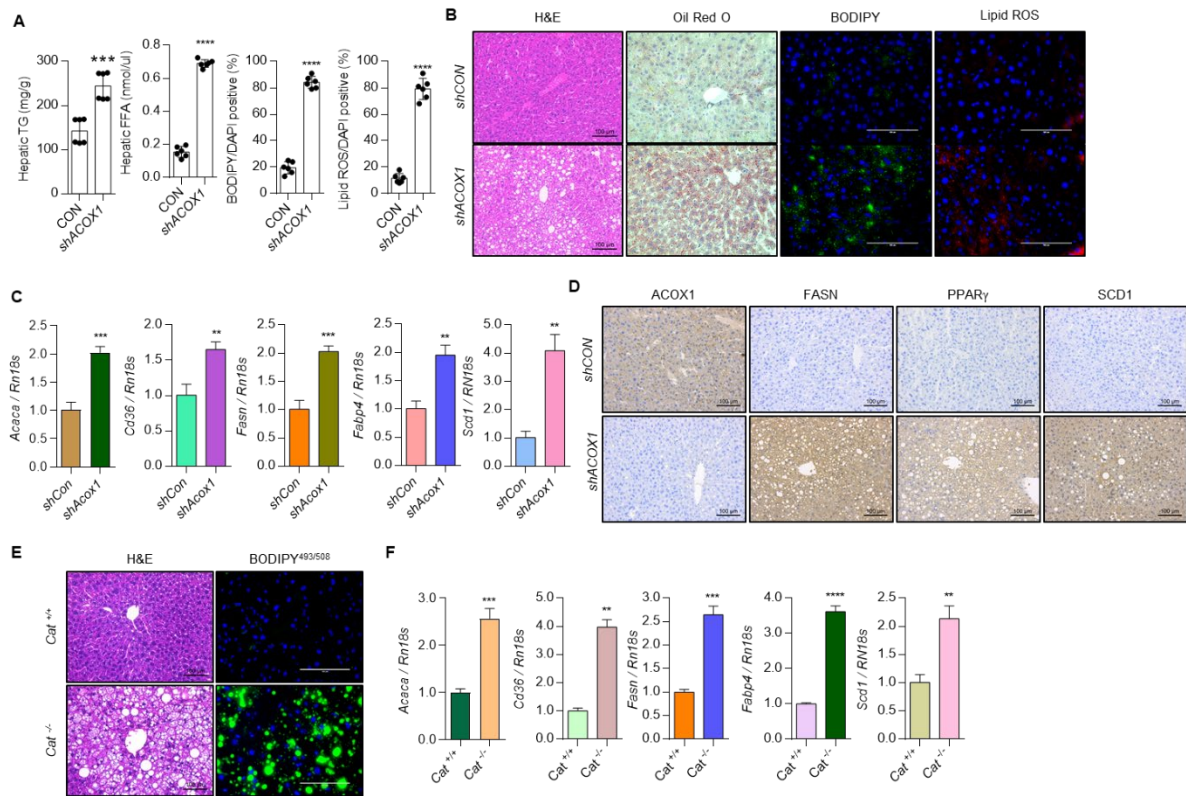

**Figure S1. Peroxisome dysfunction induces hepatic lipid accumulation, related to Figure 1.**

(A) Positive percentage of TG, FFA, BODIPY and Lipid ROS in *shCON* and *shAcox1* mouse liver (n = 6). (B) Representative images of H&E, Oil Red , BODIPY, and Lipid ROS staining in *shCON* and *shAcox1* mouse liver (n = 5; Scale bars, 100 μm). (C) Expression levels of *Acaca*, *Cd36*, *Fasn*, *Fabp4*, and *Scd1* of *shCon* and *shAcox1* mouse liver (n = 3). (D) Representative images of ACOX1, FASN, PPARγ, and SCD1 staining (n = 3; Sale bars, 100 μm). (E) Representative images of H&E and BODIPY staining in *Cat*<sup>+/+</sup> and *Cat*<sup>-/-</sup> mouse liver (n = 3; Scale bars, 100 μm). (F) Expression levels of *Acaca*, *CD36*, *Fasn*, *Fabp4* and *Scd1* in *Cat*<sup>+/+</sup> and *Cat*<sup>-/-</sup> mouse liver (n = 3). Values were expressed as means + s.d. An unpaired *t*-test was used for statistical analysis. \*\*P < 0.01, \*\*\*P < 0.001, \*\*\*\*P < 0.0001.

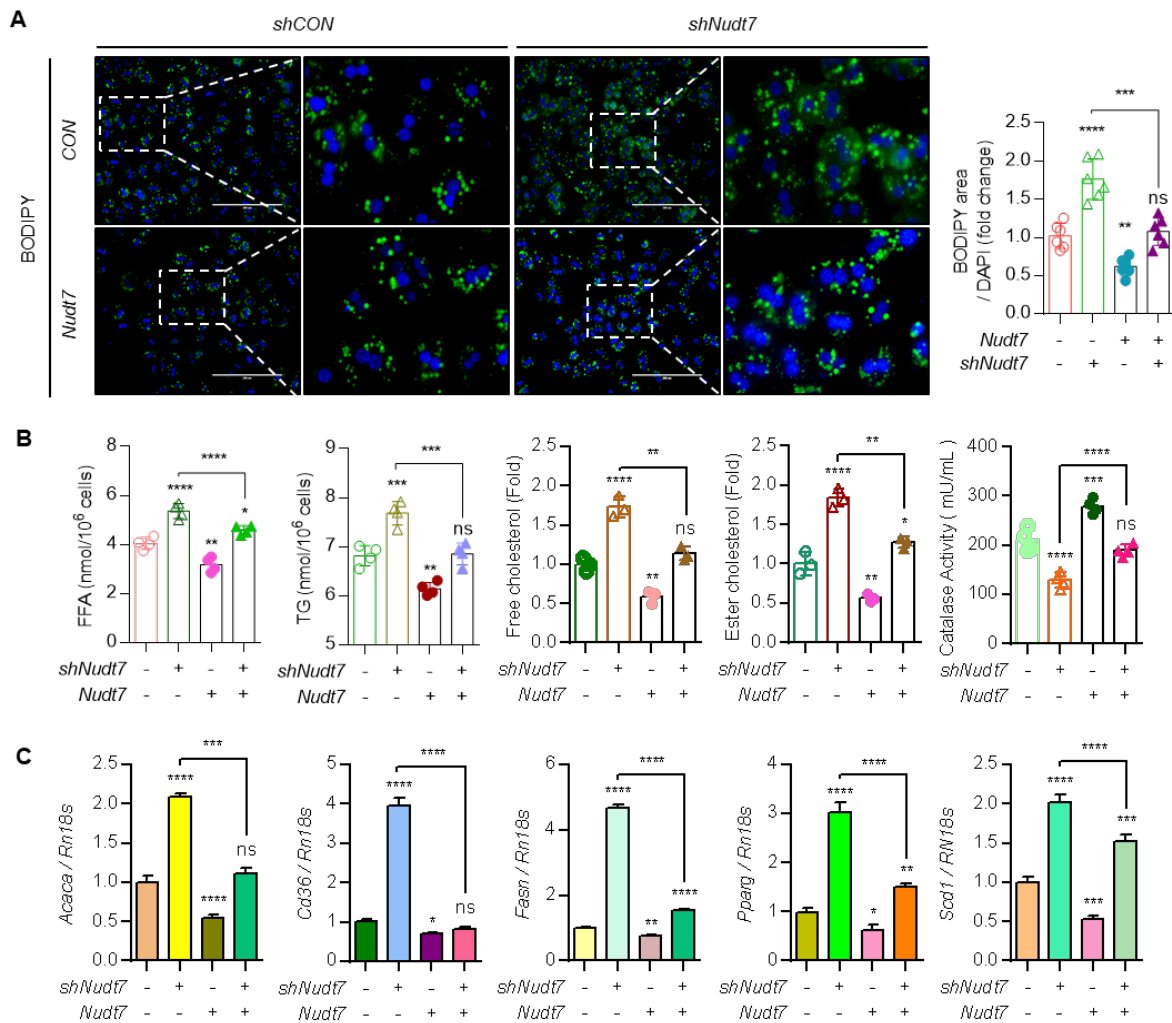

**Figure S2. In-vitro modulation of Nudt7 alters lipid accumulation, related to Figure 2.**

(A) Representative image of BODIPY staining in *shNudt7* or *Nudt7* hepatocytes and bar graph of BODIPY positive percentage was represented as the fold of CON (n=5). (B) Analysis of FFA (n = 4), TG (n = 4), free cholesterol (n = 3), ester cholesterol (n = 3) levels, and catalase activity (n = 4). (C) Expression levels of *Acaca*, *Cd36*, *Fasn*, *Pparg*, and *Scd1* were analyzed using qRT-PCR (n = 3). Values were expressed as means + s.d. An unpaired Student's t-test and one-way ANOVA multiple test were used for statistical analysis. ns = non-significant, \*P ≤ 0.05, \*\*P < 0.01, \*\*\*P < 0.001, \*\*\*\*P < 0.0001.

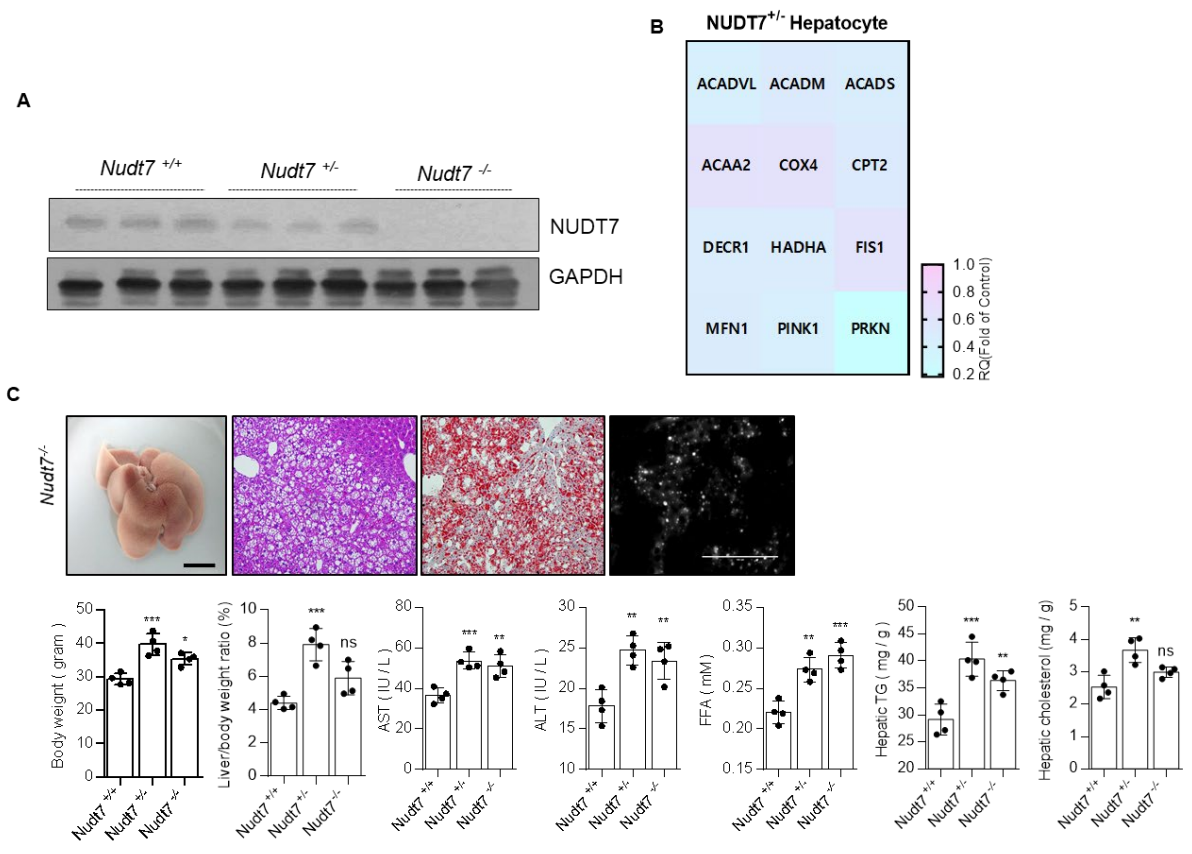

**Figure S3. *Nudt7*<sup>-/-</sup> mice induces hepatic lipid accumulation, related to Figure 3.**

(A) The expression level of NUDT7 was analyzed by immunoblotting in *Nudt7*<sup>+/+</sup>, *Nudt7*<sup>+/-</sup>, and *Nudt7*<sup>-/-</sup> liver (n = 3; GAPDH was used for loading control). (B) The expression level of mitochondria related genes was analyzed by qRT-PCR (n = 3). (C) Representative images of liver, H&E, Oil Red O, and Filipin staining of *Nudt7*<sup>-/-</sup> NCD liver (n = 4). The weight of body and liver, and the level of AST, ALT, FFA, TG, and cholesterol were analyzed in *Nudt7*<sup>+/+</sup>, *Nudt7*<sup>+/-</sup>, and *Nudt7*<sup>-/-</sup> mouse (n = 4). Values were expressed as means + s.d. An unpaired Student's t-test and one-way ANOVA multiple test were used for statistical analysis. ns = non-significant, \*P ≤ 0.05, \*\*P < 0.01, \*\*\*P < 0.001.

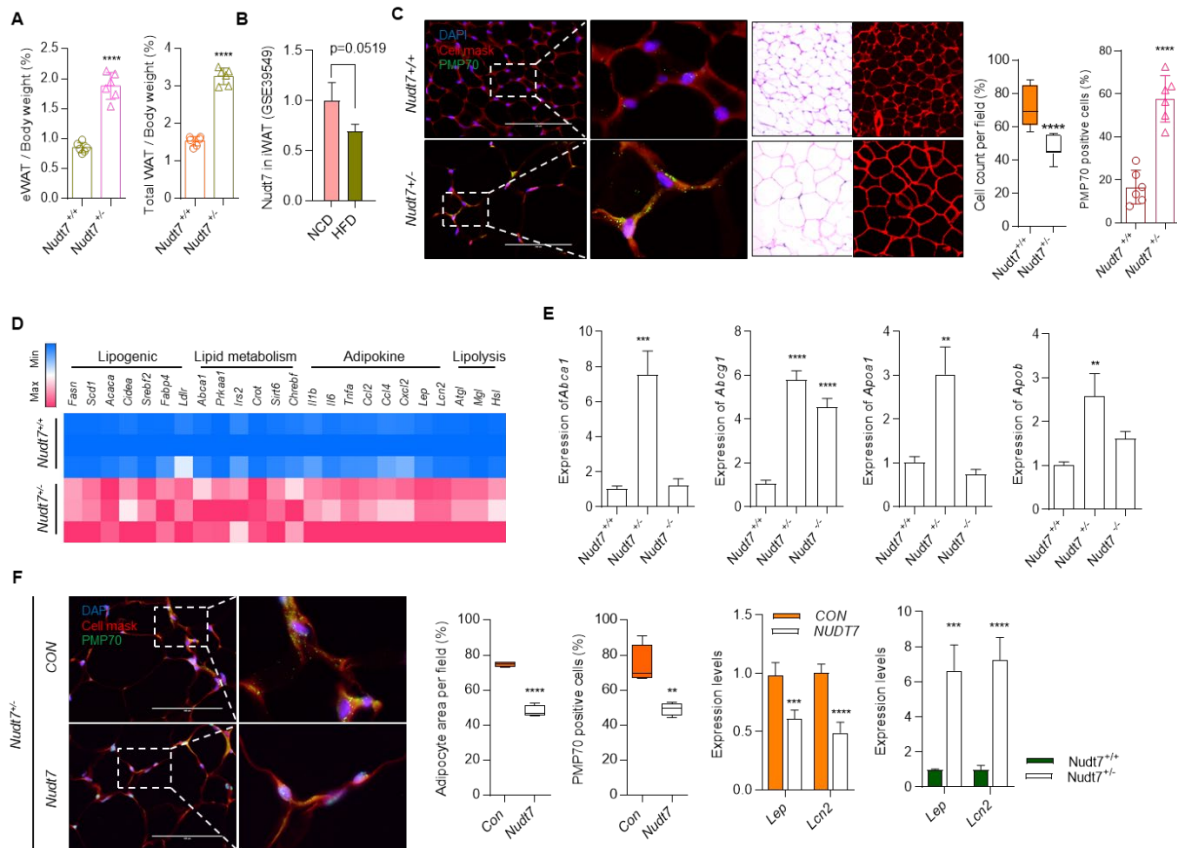

**Figure S4. *Nudt7<sup>+/-</sup>* mice displays adipocyte enlargement and adipose expansion, related to Figure 3.**

(A) The weight of eWAT and total WAT to body weight (n = 4). (B) The expression level of *Nudt7* in GSE39549. (C) Representative images of cell mask orange and PMP70 staining and graphs with adipocyte area per field and percentage of PMP70-positive cell counting (n = 3; Scale bars, 100  $\mu$ m). (D) The expression levels of genes in lipid metabolism were analyzed by qRT-PCR (n = 3). (E) The expression levels of *Aba1*, *Abcg1*, *Apoa1*, and *Apob* in *Nudt7<sup>+/+</sup>*, *Nudt7<sup>+/-</sup>*, and *Nudt7<sup>-/-</sup>* adipocytes (n = 3). (F) Representative images of cell mask orange and PMP70 staining and graphs with adipocyte area per field and percentage of PMP70-positive cell counting (n = 4; Scale bars, 100  $\mu$ m), and expression levels of *Lep* and *Lcn2* in *Nudt7<sup>+/-</sup>* adipocytes with NUDT7 restoration. Values were expressed as means + s.d. An unpaired

Student's t-test and one-way ANOVA multiple test were used for statistical analysis.  
 \*\*P < 0.01, \*\*\*P < 0.001, \*\*\*\*P < 0.0001.

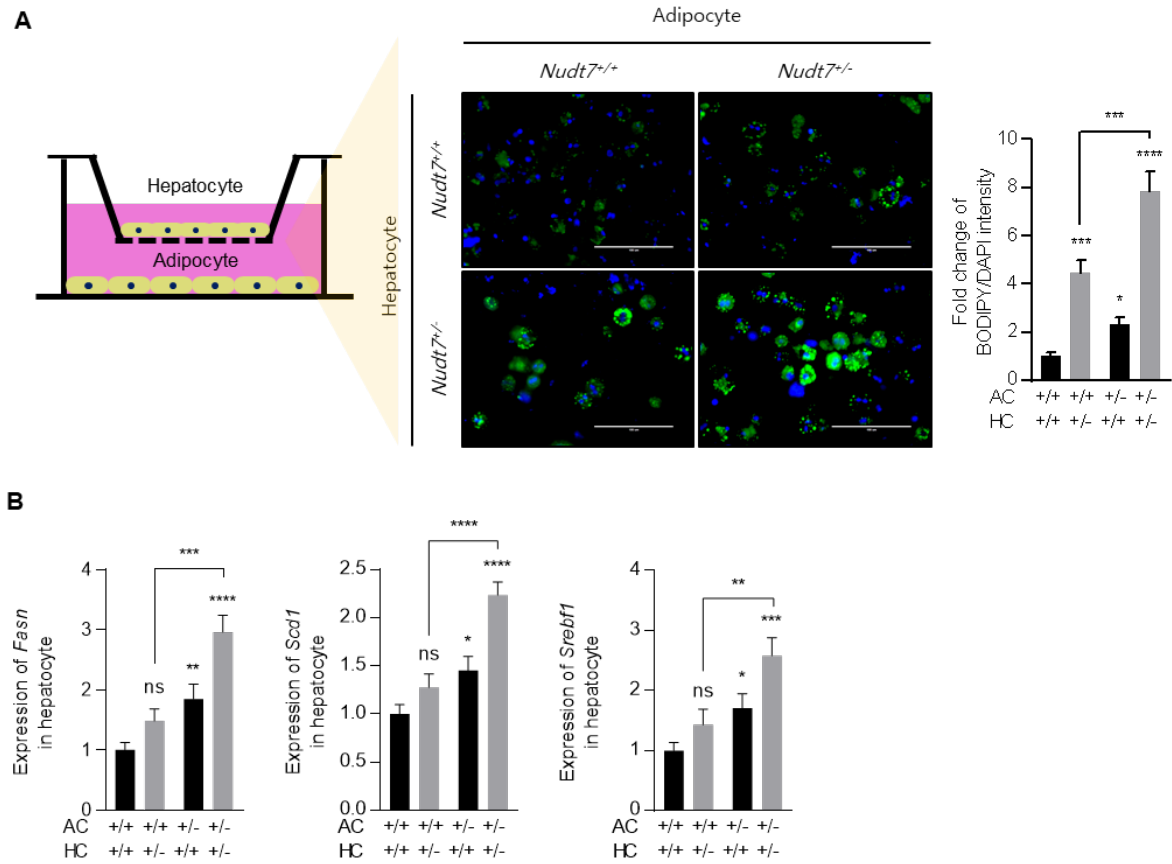

**Figure S5. Increased lipolysis of adipose tissue affects hepatic lipid accumulation in**

***Nudt7*<sup>-/-</sup> mice, related to Figure 3.**

(A) Co-culture of hepatocytes and adipocytes isolate from *Nudt7*<sup>+/+</sup> or *Nudt7*<sup>-/-</sup> mice. Representative image of BODIPY staining and bar graph of BODIPY intensity in hepatocytes was represented as fold of control. (B) The expression levels of *Fasn*, *Scd1*, and *Srebf1* in hepatocyte were analyzed by qRT-PCR (n = 3). Values were expressed as means + s.d. An unpaired t-test was used for statistical analysis. ns = non-significant, \*P ≤ 0.05, \*\*P < 0.01, \*\*\*P < 0.001, \*\*\*\*P < 0.0001.

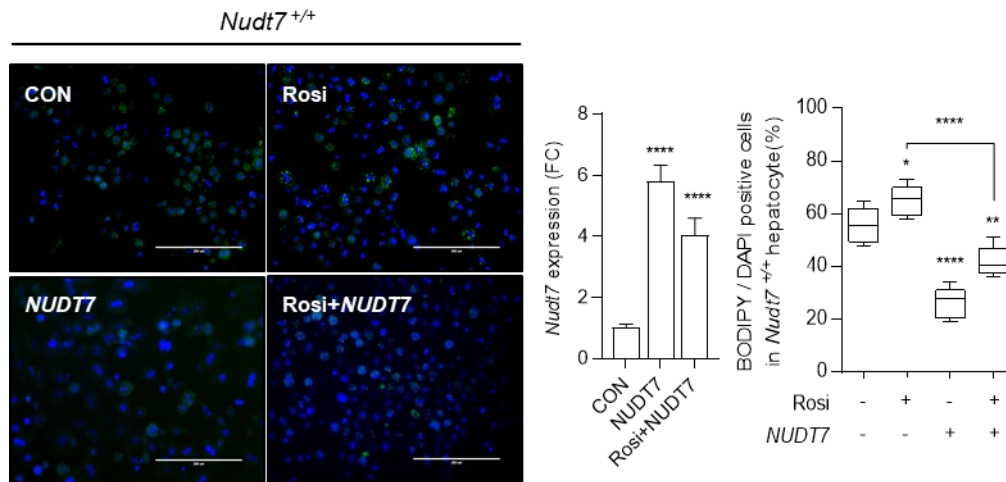

**Figure S6. Exposure of PPAR $\gamma$  agonist induces lipid accumulation in *Nudt7*<sup>+/-</sup> hepatocytes, related to Figure 4.**

Representative image of BODIPY staining, positive cell counting (n = 3), and *Nudt7* expression level in *Nudt7*<sup>+/-</sup> hepatocytes in the presence of 10  $\mu$ M rosiglitazone (Rosi) with/without introduction of pcDNA-Nudt7. Scale bars, 200  $\mu$ m. Values were expressed as means + s.d. An unpaired t-test or one-way ANOVA were used for statistical analysis. \*P  $\leq$  0.05, \*\*P < 0.01, \*\*\*P < 0.001, \*\*\*\*P < 0.0001.



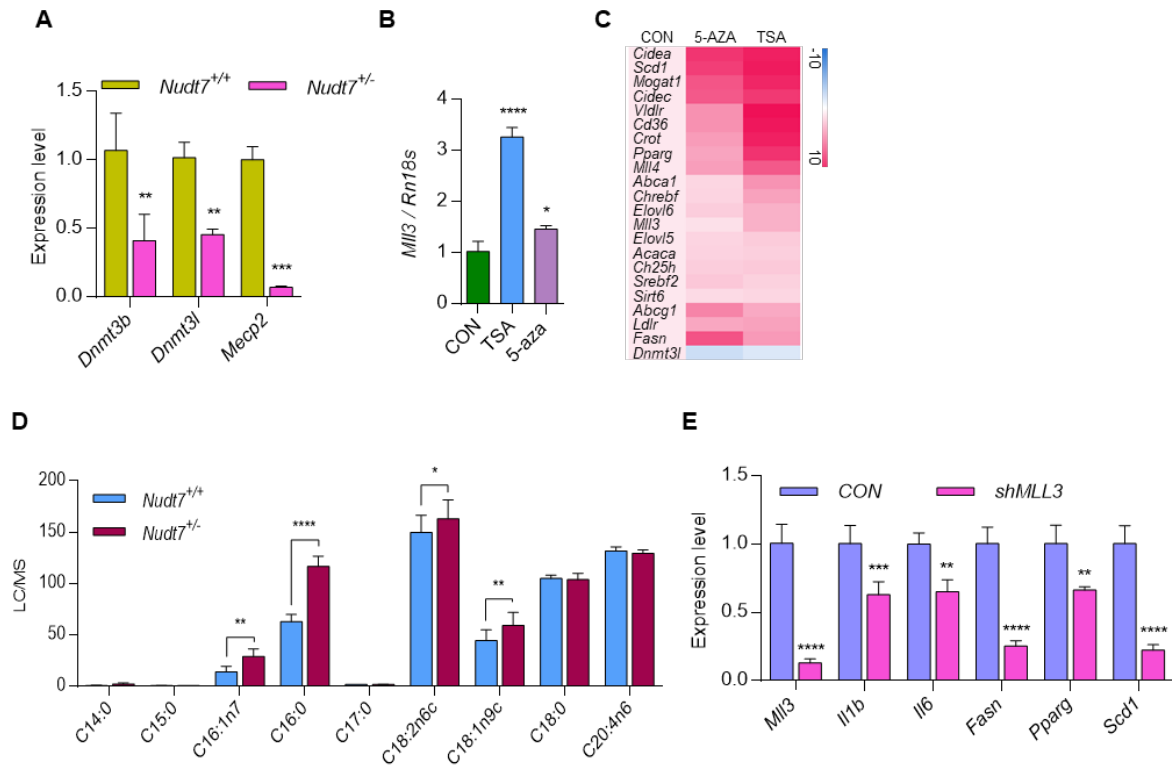

**Figure S7. The possible involvement of *Mll3* in hepatic lipogenesis, related to Figure 5.**

(A) The expression levels of *Dnmt3b*, *Dnmt3l*, and *Mecp2* were analyzed by qRT-PCR (n = 3). (B) Primary cultured hepatocyte was treated with TSA or 5-aza and the expression level of *Mll3* was analyzed by qRT-PCR (n = 3). (C) The expression level of lipogenic genes (n = 3) was analyzed by qRT-PCR. (D) Lipidomic analysis of *Nudt7*<sup>+/+</sup> and *Nudt7*<sup>+/-</sup> liver (n = 3). (E) The expression levels of *Mll3*, lipogenic genes, and inflammatory cytokine (n = 3). Values were expressed as means + s.d. An unpaired *t*-test or one-way ANOVA multiple comparisons were used for statistical analysis. \**P* ≤ 0.05, \*\**P* < 0.01, \*\*\**P* < 0.001, \*\*\*\**P* < 0.0001.

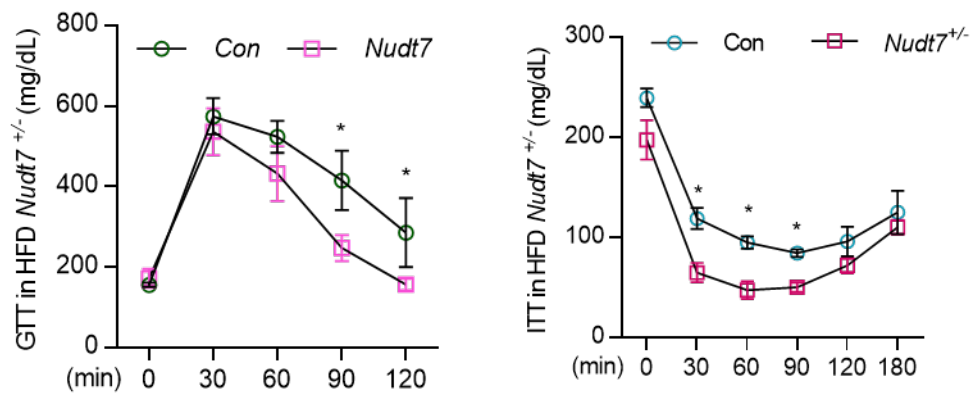

**Figure S8. Impaired glucose and insulin tolerance by *Nudt7* deficiency could be rescued by the restoration of *Nudt7*, related to Figure 6.** Analysis of glucose and insulin tolerance levels in HFD *Nudt7*<sup>+/+</sup> and *Nudt7*<sup>+/-</sup> mice. An unpaired Student's *t*-test was used for statistical analysis. \* $P \leq 0.05$ .

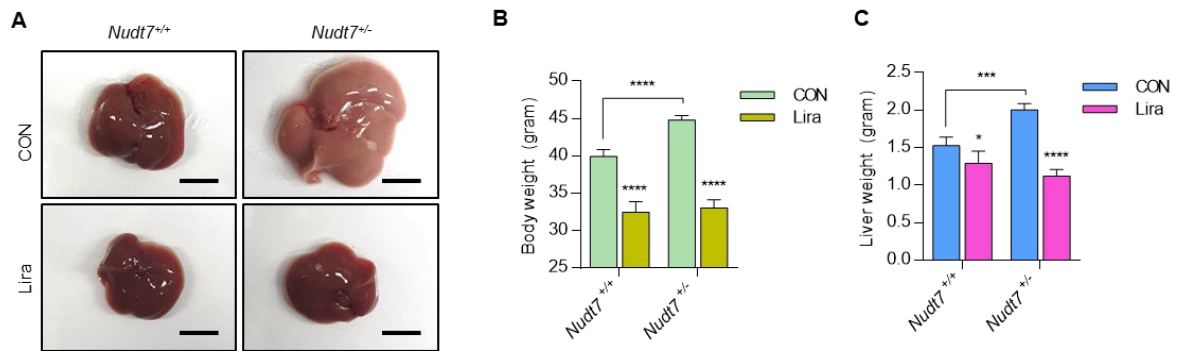

**Figure S9. The effect of liraglutide in *Nudt7*<sup>+/-</sup> liver, related to Figure 7.**

(A) Representative images of mouse liver of HFD fed *Nudt7*<sup>+/-</sup> mice with liraglutide or equal volume of sterile saline i.p. injected mouse. (B) Body weight and (C) liver weight were analyzed (n = 4).

**Table S1. Clinical characteristics of enrolled patients, related to Figure 2.**

| Variables                          | Median (IQR) or N (%)   |
|------------------------------------|-------------------------|
| Male : Female (%)                  | 10: 12 (4.5 :54.5)      |
| Age (year)                         | 39.00 (33.00-47.75)     |
| Hypertension, N (%)                | 10 (45.5)               |
| Type 2 Diabetes, N (%)             | 10 (45.5)               |
| Dyslipidemia, N (%)                | 10 (45.5)               |
| Body mass index, kg/m <sup>2</sup> | 37.67 ( 33.95-44.02)    |
| Total body fat (%)                 | 47.15 (42.45-51.68)     |
| Systolic BP, mmHg                  | 140.00 (12.6.25-150.00) |
| Diastolic BP mmHg                  | 80.00 (70.00-90.00)     |
| eGFR mL/min/1.73 m <sup>2</sup>    | 113.60 (79.45-121.25)   |
| ALP, U/L                           | 64.00 (50.75-79.00)     |
| AST, IU/L                          | 34.00 (20.75-43.00)     |
| ALT, IU/L                          | 33.50 (19.50-44.50)     |
| γ-GT, U/L                          | 31.00 (18.50-47.00)     |
| Total cholesterol (mg/dL)          | 178.00 (147.50-201.00)  |
| LDL cholesterol (mg/dL)            | 124.00 (92.25-142.00)   |
| HDL- cholesterol (mg/dL)           | 45.50 (37.00-51.25)     |
| Triglyceride (mg/dL)               | 124.50 (79.25-203.75)   |
| HbA1C (%)                          | 5.80 (5.60-6.30)        |
| Fasting glucose (mg/dL)            | 105.00 (89.75-114.25)   |
| HOMA IR                            | 4.56 (2.49-7.44)        |
| Fibrotic Stage                     |                         |
| F1                                 | 4 (18.2)                |
| F2                                 | 7 (77.3)                |
| F3                                 | 1 (4.5)                 |
| NAS                                |                         |
| 1                                  | 0 (0.0)                 |
| 2                                  | 6 (27.3)                |
| 3                                  | 11 (50.0)               |
| 4                                  | 3 (13.6)                |
| 5                                  | 2 (9.1)                 |

BP, Blood pressure; γ-GT, γ-glutamyltransferase; ALT, alanine aminotransferase; AST, aspartate aminotransferase; HDL, high-density lipoprotein; HbA1c, glycated hemoglobin A1c; HOMA-IR, Homeostasis Model Assessment of Insulin Resistance; LDL, low-density lipoprotein, NAS; Nonalcoholic fatty liver disease Activity Score.

**Table S2. Primers used for qRT-PCR analysis, related to STAR Methods.**

| Description          | Symbol                 | Forward (5' to 3')      | Reverse (5' to 3')        |
|----------------------|------------------------|-------------------------|---------------------------|
| Peroxisome profiling | <i>Abcd2</i>           | GACCATGCCTATGAGACCTATTT | GTAAGAGACTGGTCAGGGTTTG    |
|                      | <i>Acad11</i>          | CCCAAAGAGTGTCCGGTTATAG  | GTGCCTGGGCCAATAGTAAA      |
|                      | <i>Acot1</i>           | CGTCATGGCTCTGGCTTATTA   | CAGGTAGTTCACGGCTTCTT      |
|                      | <i>Acot2</i>           | CGTGATGGCTCTGGCTTATTA   | CAGGTAGTTCACGGCTTCTT      |
|                      | <i>Acot8</i>           | ACTGGAGCCCAAACAGATG     | AGGAAGGCGTAGTCAGAGATA     |
|                      | <i>Acox1</i>           | CGCACATCTTGATGGTAGT     | GGCTTCGAGTGAGGAAGTTATAG   |
|                      | <i>Acox3</i>           | ACCCACGGATAAGGAAGAGA    | GAGAAGTGGTCCAAGGCATAG     |
|                      | <i>Acsf3</i>           | GAGTGGAAGTACGCATCATCTC  | GAACCTGGAGTCACCTTTG       |
|                      | <i>Acs1</i>            | GCTTGTGGATGTGGAAGAAATG  | TCTTGCTGGGTCTTTCAAGTAG    |
|                      | <i>Acs13</i>           | GGCTGTGCACTGGAGATATT    | GTACTCTCCTGCCTGTAGTTTC    |
|                      | <i>Aldh3a2</i>         | GGCTTCTCCTGACTATGAAAGG  | CATCCATCTCTCCACCGAAAG     |
|                      | <i>Crat</i>            | GGAGGCCCATATCAACTTCTC   | ATGTCCAGCAGAGCTTTCTC      |
|                      | <i>Crot</i>            | TGCTGTGATCATGCTCCTTAC   | CTGAACCTTCCATCTTCCTTC     |
|                      | <i>Ephx2</i>           | GTAAGGGTTGGGACGAAAGA    | GACATTTCCAGGACGGAGTACAA   |
|                      | <i>Far1</i>            | CAAGAGCGAGTGGAGGAAAT    | AGCCAGTTTAGGTTGGGTAAG     |
|                      | <i>Hacl1</i>           | TTTGGACTGCCTCCAAGATAC   | TCACAGAAGGCTGACATTATT     |
|                      | <i>ldh1</i>            | GTGGAGATGCAAGGAGATGAA   | ATGCAGATCCAGTTCACATAG     |
|                      | <i>Idi1</i>            | ACAGCAGAGATCAGATGCTAAA  | GCTCGCCTGGGTTACTTAAT      |
|                      | <i>Idi2</i>            | CCCAGGACCAGATTTCCATAAA  | ACCAACAGAAGGTAGCCAATC     |
|                      | <i>Mlycd</i>           | CTGCCATCTTCTACTCCATCAG  | GCTCCTTGACCACTCTCTTTAT    |
|                      | <i>Mpv17</i>           | GCCCTCATCACCAACTACTATC  | CAATAGCAACACACTGGACAAC    |
|                      | <i>Mvk</i>             | GGAGCAACTGGAGAAGCTAAA   | TGCCAGGTACAGGTAGAGAA      |
|                      | <i>Nudt12</i>          | GGAAGAGGAAAGTGGAGTCAA   | GTAGACACTGCCACAGCTAAA     |
|                      | <i>Nudt7</i>           | CAGTTTGCTAGATGATGCTAAGG | AAAGGACGGAGTATTTGTTATATGG |
|                      | <i>Peci</i>            | CCTCTGGTTGCGGTAGTAAAT   | GAGTTGGCTGAATGGAGTATGA    |
|                      | <i>Pecr</i>            | GCGAAATGGGACAAACCTTATT  | ACAGCAGGAAACATACCAGAG     |
|                      | <i>Pex1</i>            | GGAGATGGAGAATGTGGCTTAG  | CCAAAGTAGAGCCGGTACATATT   |
|                      | <i>Pex11a</i>          | TCCTTCCTCCTCCTCCTATTC   | GCCGAGATTGGACTTGTAGAT     |
|                      | <i>Pex11b</i>          | ATCTGAGCCGTGATGCTTATG   | CCTGAGACTCCTACTCCAGAAA    |
|                      | <i>Pex11g</i>          | AGTATGGCCTGGGAACAAAG    | GCGATATGCTCACAAGGATAGT    |
|                      | <i>Pex12</i>           | CAGAAGCGTTGGTGAGAAGATA  | CAGGAAGAATACCCCCACAGAG    |
|                      | <i>Pex19</i>           | GCTAGATCTCATGCAGCAGTTA  | TTGAGAGCATCCAGGTCAAAG     |
|                      | <i>pex26</i>           | CTGGAGCTGTGCATCCTTT     | AGGAAGGCCCTGGTTATCT       |
|                      | <i>Pex6</i>            | CTGACTGGTGCAGATCTCTATTC | CAGCTCTAGCCCTTCCTCTA      |
|                      | <i>pex7</i>            | CATGTCCTTGTACCTGTAGTG   | CTCCTGCGTGTGCTCTTTAT      |
|                      | <i>Pipox</i>           | CAAGGGATCGACCATGAGTATC  | ATAGAGGACACCTCCAGTCTT     |
|                      | <i>Prdx1</i>           | CCGCTCTGTGGATGAGATTATAC | GTATCACTGCCAGGTTTCCA      |
|                      | <i>Rhoc</i>            | TCCGAAAGAAGCTGGTGATTG   | AAAGACGGTAGGCACGTAGA      |
|                      | <i>Scp2</i>            | CGGACCACTCCAAGTATAAA    | TCCCAGCATACCCAAACATC      |
|                      | <i>Slc22a5</i>         | ATAATCCTGTGGCTGACCATATC | CCAGTAGGAAGCAGTTCACATAG   |
| <i>Sod1</i>          | CTCAGGAGAGCATTCCATCATT | CTCCCAGCATTTCCAGTCTT    |                           |
| <i>Xdh</i>           | CCACATGGACAACGCCTATAA  | GCTGTGTTAGAGGGCAGATTAG  |                           |
| <i>Rn18s</i>         | CCAGTAAGTGCGGGTCATAAG  | GGCCTACTAAACCATCCAA     |                           |
| Lipogenic genes      | <i>Acaca</i>           | AGCCAGAAGGGACAGTAGAA    | CTCAGCCAAGCGGATGTAAG      |
|                      | <i>Cd36</i>            | CTGGGACCATTGGTGTGATAA   | CACCACTCCAATCCCAAGTAAG    |
|                      | <i>Cidea</i>           | GCAACCAAAGAAATCGGGAATAG | CTCGTACATCGTGGCTTTGA      |
|                      | <i>Elovl5</i>          | GGTGTGTGGGAAGGCAAATAC   | TGGAGAAGTAGTACCACCAGAG    |
|                      | <i>Fabp4</i>           | GGATGGAAAGTCGACCACAATA  | TGGCTCATGCCCTTTTATAA      |
|                      | <i>Fasn</i>            | AGACCCGAAGTCCAAGTTATTC  | GCAGCTCCTTGTATACTTCTCC    |

|                       |               |                         |                         |
|-----------------------|---------------|-------------------------|-------------------------|
|                       | <i>Ldlr</i>   | ATCCACCGCAACATCTACTG    | GGAACAGTGTCTCCTCTTTAC   |
|                       | <i>Scd1</i>   | CAACTTCACCACGTTCTTCATC  | CCCGTCTCCAGTTCTCTTAATC  |
|                       | <i>Srebf1</i> | ACTTCCCTGGCCTATTTGACC   | GGCATGGACGGGTACATCTT    |
| Lipid metabolic genes | <i>Abca1</i>  | GTTTCCGGGAAGTGCCTAAA    | CTGGGAGAGGATGCTGAATATC  |
|                       | <i>Cat</i>    | GATGGTAACTGGGATCTTGTGG  | GTGGGTTTCTCTTCTGGCTATG  |
|                       | <i>Chrebf</i> | CAGCTGCGGGATGAAATAGA    | CAAAGCGCTGATGTGTGATG    |
|                       | <i>Crot</i>   | TGCTGTGATCATGCTCCT      | CTGAACCCCTCCATCTTCCTT   |
|                       | <i>Irs2</i>   | ATGGGTACATGAGCATGGATAG  | CAGGCGTGGTTAGGGAATAA    |
|                       | <i>Prkaa1</i> | GATCCTTCCGGTGTGGATTAT   | GAAAGACCAAAGTCGGCTATCT  |
|                       | <i>Ppara</i>  | CGGTGTGTATGAAGCCATCT    | TAAGGAACTCGCGTGTGATAAA  |
|                       | <i>Pparg</i>  | CTGGCCTCCCTGATGAATAAAG  | AGGCTCCATAAAGTCACCAAAG  |
|                       | <i>Sirt6</i>  | CGTCTGGTCATTGTCAACCT    | GAGTCTGCACATCACCTCATC   |
| Adipokine genes       | <i>Ccl2</i>   | CTCACCTGCTGCTACTCATT    | ACTACAGCTTCTTTGGGACAC   |
|                       | <i>Ccl4</i>   | CCACTTCCTGCTGTTTCTCTTA  | CAAAGACTGCTGGTCTCATAGT  |
|                       | <i>Ccl5</i>   | GCCCACGTCAAGGAGTATTT    | CTTGAACCCACTTCTTCTCTGG  |
|                       | <i>Cxcl2</i>  | GACAGAAGTCATAGCCACTCTC  | GCCTTGCCTTTGTTCAGTATC   |
|                       | <i>Il1b</i>   | CCACCTCAATGGACAGAATATCA | CCCAAGGCCACAGGTATTT     |
|                       | <i>Il6</i>    | CCAGAGTCCTTCAGAGAGATACA | CCTTCTGTGACTCCAGCTTATC  |
|                       | <i>Lep</i>    | GACTTCATTCTCTGGGCTTCA   | ATTCTCCAGGTCAATTGGCTATC |
|                       | <i>Lcn2</i>   | TGGCCCTGAGTGTGATGTG     | CTCTTGTAGCTCATAGATGGTGC |
|                       | <i>Tnfa</i>   | TTGTCTACTCCCAGGTTCTCT   | GAGGTTGACTTTCTCCTGGTATG |

|                            |               |                          |                          |
|----------------------------|---------------|--------------------------|--------------------------|
| Lipolysis genes            | <i>Atgl</i>   | CATCCGTGGCTGTCTACTAAAG   | GACGTTCTCTCCGTCTGAAAC    |
|                            | <i>Hsl</i>    | CATCAACCACTGTGAGGGTAAG   | AAGGGAGGTGAGATGGTAACT    |
|                            | <i>Mgl</i>    | AAGAGTGGAGCGAGCAATG      | GATGATTCCATGAGCAGGTAGG   |
| Histone modification genes | <i>Dnmt3b</i> | GGTCTCCAGCCTTCTGAATTAC   | CAGAGCCATTCCCATCATCTAC   |
|                            | <i>Dnmt3l</i> | GCAGAGACTACCAGAATGCTATG  | TGACTTGGGCTTGCAGATAC     |
|                            | <i>Mecp2</i>  | AGGCAGGCAAAGCAGAAACATCAG | TCATACTTTCCAGCAGATCGGCCA |
|                            | <i>Mll1</i>   | CGAGGAAAGAGATCAGCAGAAG   | AGTCCGCGTGAAGTTGTAATAG   |
|                            | <i>Mll2</i>   | AGTACCTGAAAGGCGAAGAAC    | CGCCCGTAGCGGAATAAATA     |
|                            | <i>Mll3</i>   | CGACTCTCTGTTGACCCTTATG   | ATTGCTGGGTGTGGAGTTAG     |
|                            | <i>Mll4</i>   | GTTCCGATAGGAAGGAGCTTATG  | CATCCTCAAGCCCTGGTAAAT    |
